# Supplementary material
Source: PubMed Central journal article supplement (PMC5222699)

# SUPPLEMENTAL FIGURE 1

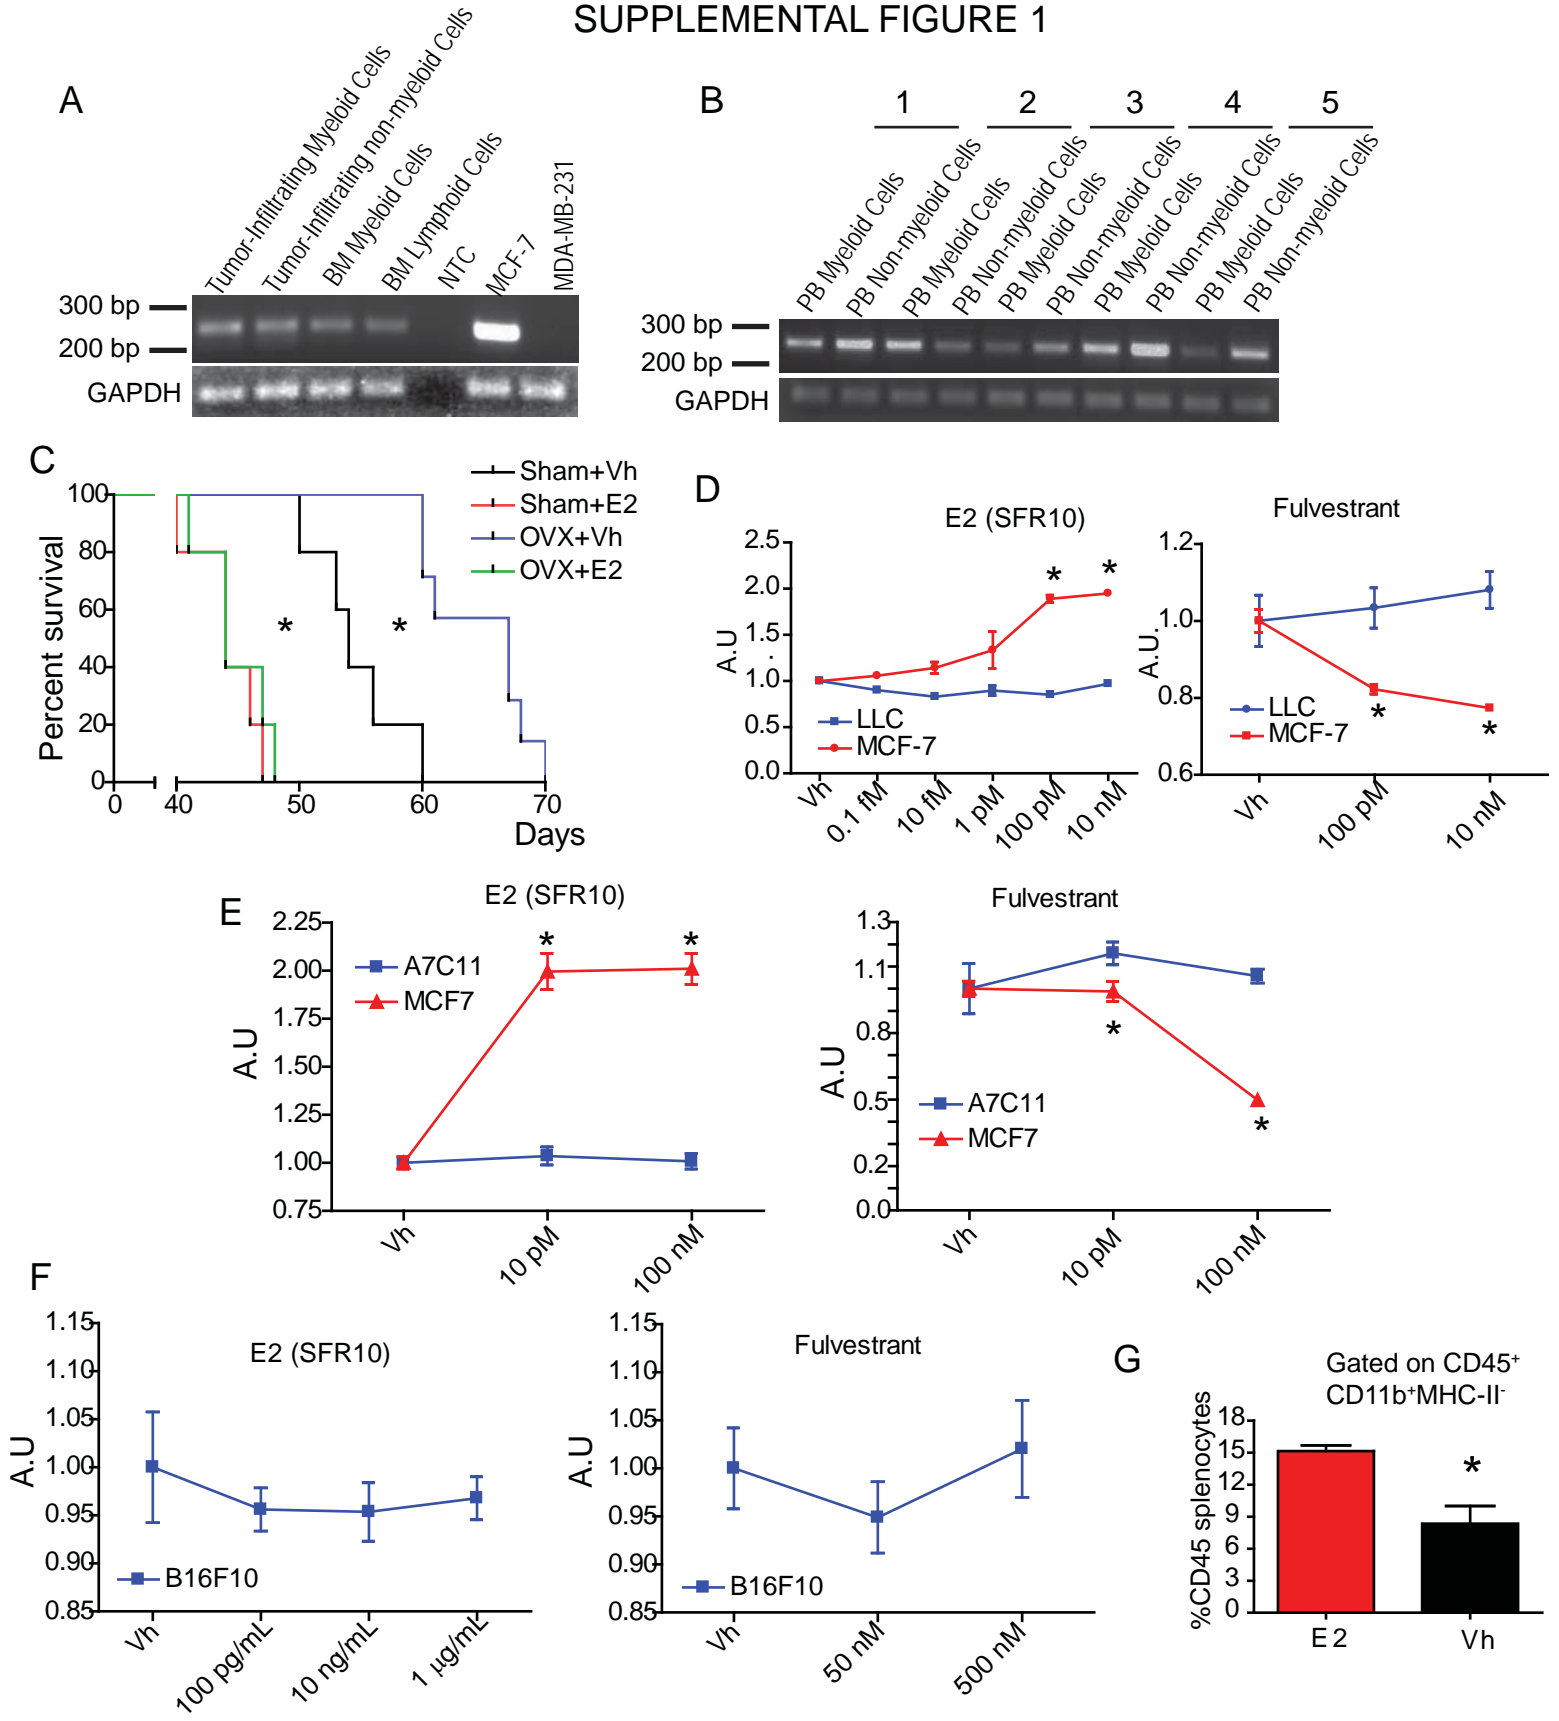

Supplement: NIHMS827169-supplement-2.pdf [file NIHMS827169-supplement-2.pdf]

# SUPPLEMENTAL FIGURE 2

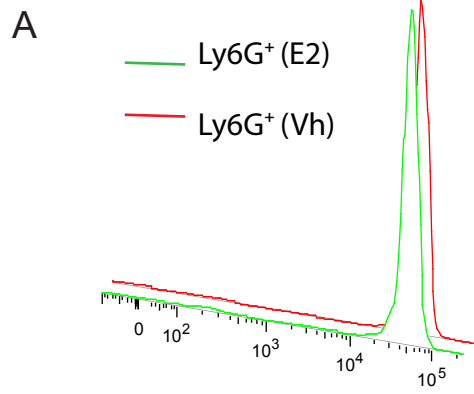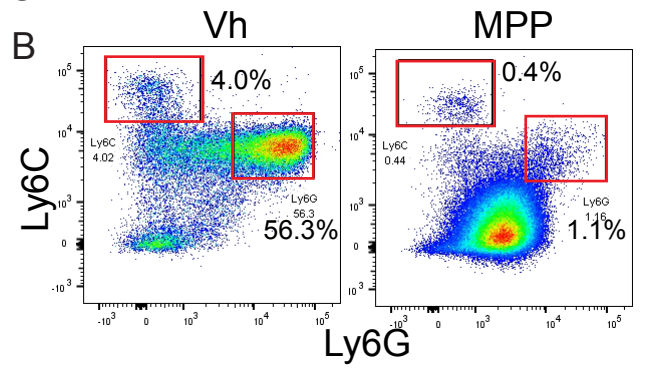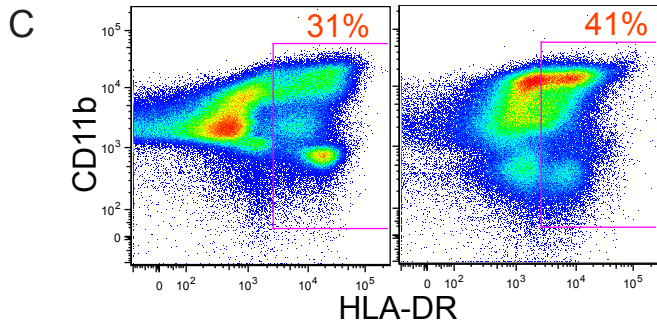

Supplement: NIHMS827169-supplement-3.pdf [file NIHMS827169-supplement-3.pdf]
